# Supplementary material for: NaY(MoO4)2 microcrystals with controlled faceting and their tunable photoluminescence properties after doping with Eu3+
Source: Royal Society of Chemistry journal article supplement (doi:10.1039/c4ra00244j), 2014-01-01
Supplement: c4ra00244j1.pdf [file c4ra00244j1.pdf]

**Supporting information for**

**NaY(MoO<sub>4</sub>)<sub>2</sub> microcrystals with controlled faceting and  
their tunable photoluminescence properties after doping  
with Eu<sup>3+</sup>**

Lin Xu,<sup>a</sup> Xiaoyan Yang,<sup>a</sup> Haimeng Lu,<sup>b</sup> Chenhui Hu<sup>a</sup> and Wenhua Hou<sup>\*ab</sup>

<sup>a</sup> Key Laboratory of Mesoscopic Chemistry of MOE, School of Chemistry and Chemical

*Engineering, Nanjing University, Nanjing 210093, P. R. China.*

<sup>b</sup> Nanjing University-Yangzhou Institute of Chemistry and Chemical Engineering, Yangzhou,

*211400, P. R. China*

\*Corresponding author. Fax: +86-25-83317761; Tel: +86-25-83686001; E-mail:

[whou@nju.edu.cn](mailto:whou@nju.edu.cn)

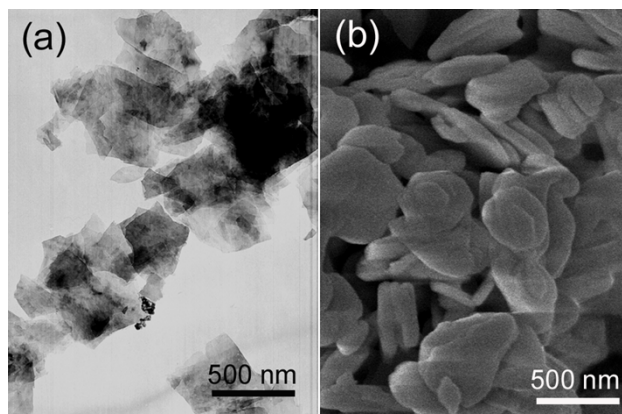

**Fig. S1.** (a) TEM image and (b) SEM image of the products obtained in the absence of EDTA at 180 °C.

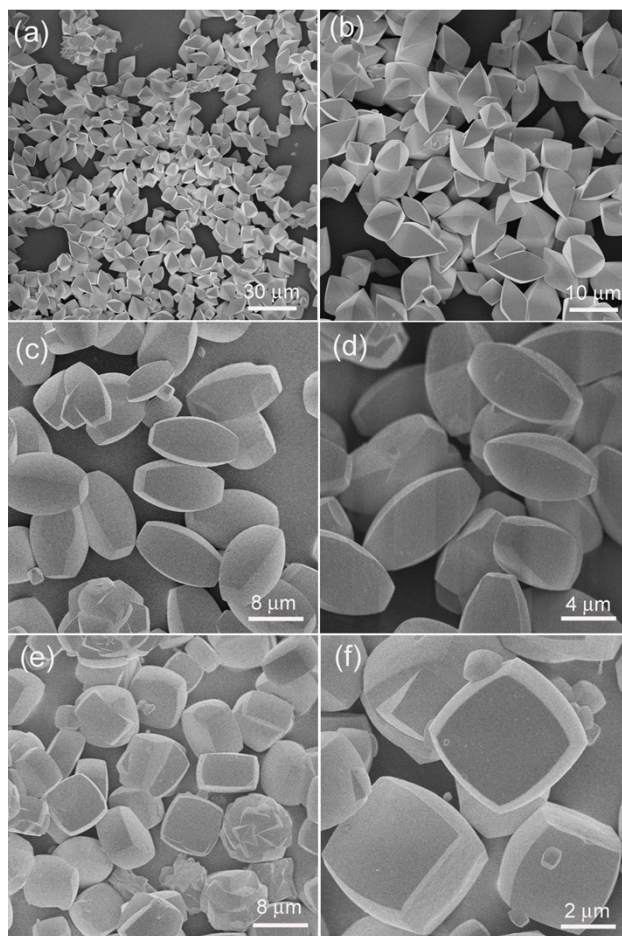

**Fig. S2** SEM images of the  $\text{NaY}(\text{MoO}_4)_2:\text{Eu}^{3+}$  microstructures obtained at  $\text{pH} = 5$  with the assistance of different amounts of EDTA. (a)–(b) 0.20 g EDTA. (c)–(d) 0.35 g EDTA. and (e)–(f) 0.45 g EDTA.
